# Supplementary figures and images for: Contrasting Altitude and Long-term Geographical Isolation Shaped Phylogeography of Himalrandia lichiangensis, an Endemic Species from the Dry Hot Valley of Southwest China
Source: Research Square preprint supplement (doi:10.21203/rs.3.rs-126634/v1), 2020-12-16

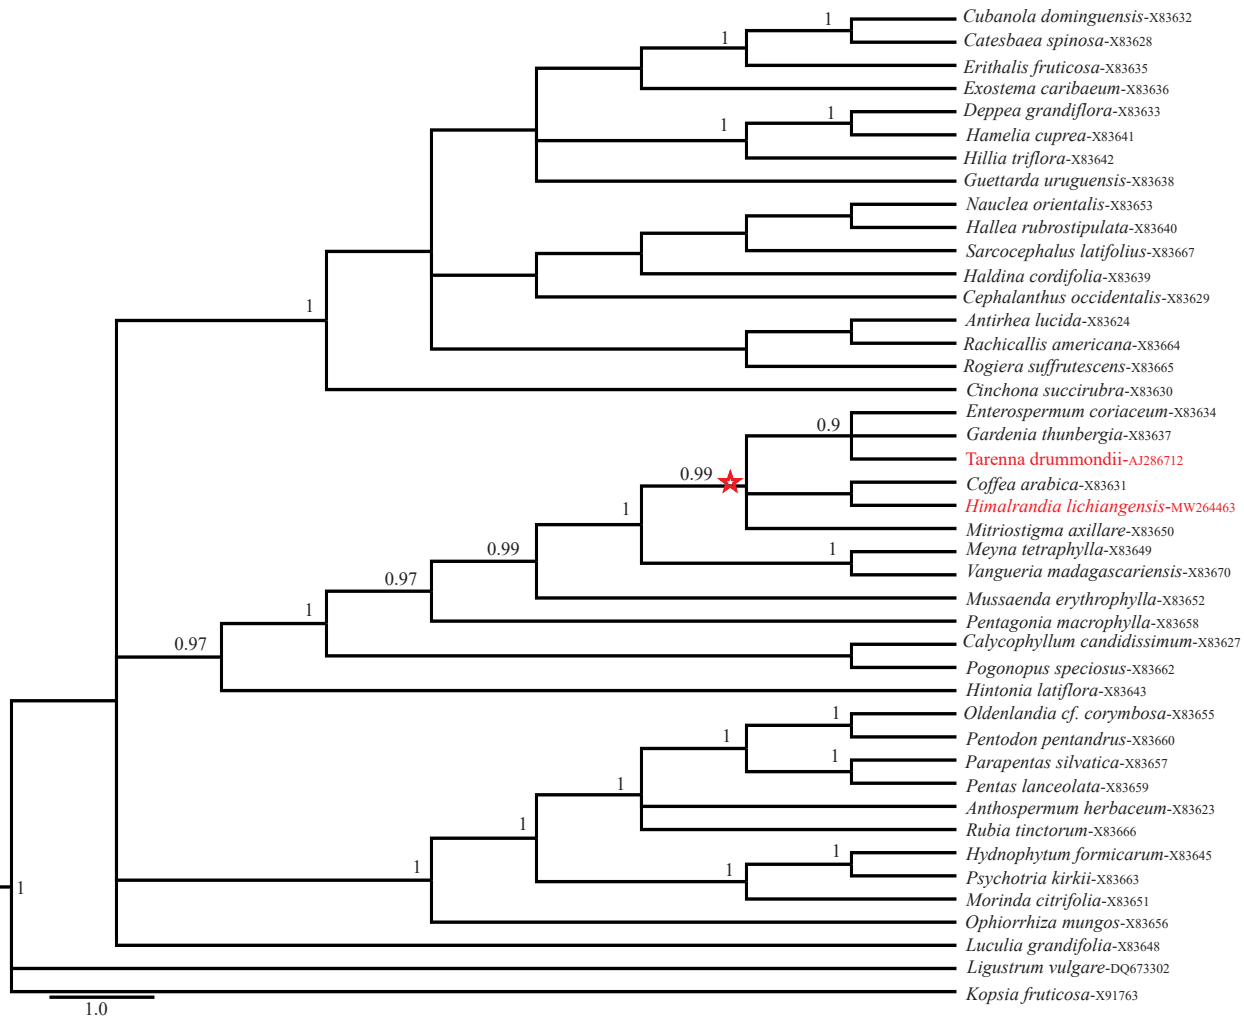

Supplement: Supplementary file 1 [file 6fd4d5031414afc973b22966.pdf]
